# Supplementary material
Source: publisher figshare collection journal article supplement (https://frontiersin.figshare.com/ndownloader/files/23598914)
Supplement: Supplementary file [file 23598914]

Supplementary Information On

# ***Stochastic dynamics of gene switching and energy dissipation for gene expression***

Quan Liu<sup>1</sup>, FengZhen Yu<sup>2</sup>, Liang Yi<sup>3</sup>, Yijun Gao<sup>1</sup>, Rong Gui<sup>1</sup>, Ming Yi<sup>4</sup>, Jianqiang Sun<sup>5,\*</sup>

<sup>1</sup>Department of Physics, College of Science, Huazhong Agricultural University, Wuhan, China

<sup>2</sup>Department of Chemistry, College of Science, Huazhong Agricultural University, Wuhan, China

<sup>3</sup>College of Animal Science and Technology and College of Veterinary Medicine, Huazhong Agricultural University, Wuhan, China

<sup>4</sup>School of Mathematics and Physics, China University of Geosciences, Wuhan, China

<sup>5</sup>School of Automation and Electrical Engineering, Linyi University, Linyi, China

## **1 DETAILED DERIVATION FROM CHEMICAL MASTER EQUATIONS TO STEADY-STATE DISTRIBUTIONS**

Since it is difficult to obtain the theoretical results of chemical master equations, the method of probability-generating functions is used to change chemical master equations into differential equations which may be solved with mathematical skill. Based on this method, two factorial probability-generating functions  $G_i(z) = \sum_{m=0}^{\infty} P_i(m)z^m$  with  $i = 0, 1$  are introduced. Substituting these into Eq.2:

$$\begin{aligned} k_{\text{off}}G_1(z) - k_{\text{on}}G_0(z) + k_2zG_1'(z) - ak_1G_0(z) + ak_3(z-1)G_0(z) - (z-1)G_0'(z) &= 0, \\ -k_{\text{off}}G_1(z) + k_{\text{on}}G_0(z) - k_2zG_1'(z) + ak_1G_0(z) + ak_3(z-1)G_1(z) - (z-1)G_1'(z) &= 0. \end{aligned} \quad (\text{S1})$$

Here, all parameters have been normalized by  $k_4$  as mentioned in Sec.II. It is found from Eq. S1 that

$$(e^{-ak_3z}G_0)' = -(e^{ak_3z}G_1)'. \quad (\text{S2})$$

$e^{-ak_3z}G_i$  is set as  $H_i$  for simplicity. From Eq. S2, we can determine that  $H_0' = -H_1'$ . This allows us to obtain  $H_0$  from  $H_1$ . In the following, we will only focus on the expression of  $H_1$ , which can be deduced from Eq. S1 as

$$A(z)H_1'' + B(z)H_1' + CH_1 = 0 \quad (\text{S3})$$

in which  $A(z) = (k_2 + 1)z - 1$ ,  $B(z) = ak_2k_3z + k_{\text{off}} + k_{\text{on}} + ak_1 + k_2 + 1$ , and  $C = ak_2k_3$ . Until now, it seems difficult to obtain the analytical distribution because the coefficients of Eq. S3 are dependent on the variable  $z$ . Another transformation of the form  $H_1(z) = e^{mz}W(nz + p)$  (here,  $m$ ,  $n$  and  $p$  are undetermined constants) is introduced in Eq. S3, and hence a solvable differential equation about  $W$  is obtained as

$$\omega W''(\omega) - (\beta - \omega)W'(\omega) - \alpha W(\omega) = 0 \quad (\text{S4})$$

where

$$\begin{aligned}\omega &= \frac{ak_2k_3}{k_2+1}z - \frac{ak_2k_3}{(k_2+1)^2}, \\ \alpha &= \frac{ak_2k_3}{(k_2+1)^2} + \frac{k_{\text{on}} + k_{\text{off}} + ak_1}{k_2+1}, \\ \beta &= \frac{ak_2k_3}{(k_2+1)^2} + \frac{k_{\text{on}} + k_{\text{off}} + ak_1}{k_2+1} + 1.\end{aligned}\quad (\text{S5})$$

There are two independent solutions of Eq. S4. One is expressed by the Tricomi function of the form  $U(\alpha, \beta; \omega)$ . This result is inadmissible because it is required that  $P_1(m) \rightarrow 0$  for  $m \rightarrow \infty$ . The other solution is expressed by the confluent hypergeometric function of the form  ${}_1F_1(\alpha, \beta; \omega)$ . The analytical expressions for the probability-generating functions are presented as below

$$\begin{aligned}G_0(z) &= A_0[e^{ak_3(z-1)} - e^{ak_3z/(k_2+1)}{}_1F_1(\alpha-1, \beta-1; \omega)], \\ G_1(z) &= A_0e^{ak_3z/(k_2+1)}{}_1F_1(\alpha, \beta; \omega)\end{aligned}\quad (\text{S6})$$

Furthermore, based on the relationship between probability distribution and generating function:

$$P_i(m) = \frac{1}{m!} \frac{d^m}{dz^m} G_0(z)|_{z=0}.$$
(S7)

The analytic results of probability distributions are obtained and shown in the text (i.e., Eq.3 in Sec.II).

## 2 THE RESULTS OF NUMERICAL SIMULATIONS

The direct method to verify our analytical results is numerical simulations. The approximate probability distributions of  $P_i(m)$  obtained by Monte Carlo simulation are given in Fig.S1.

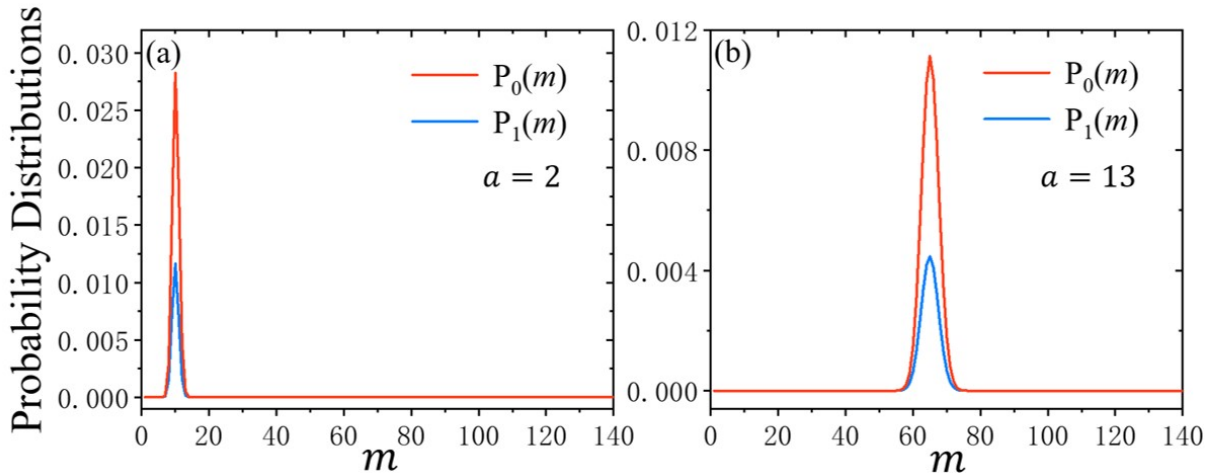

**Figure S1.** The numerical simulated results about probability distribution functions of the gene's states . The parameters are the same with Fig.3(a) and (b):  $k_1 = 20$ ,  $k_2 = 10$ ,  $k_3 = 1.5$ ,  $k_{\text{on}} = k_{\text{off}} = 2$ .  $P_0(m)$  is the probability of the gene's "off" state indicated with orange curve,  $P_1(m)$  is the probability of gene's "on" state indicated with blue curve.

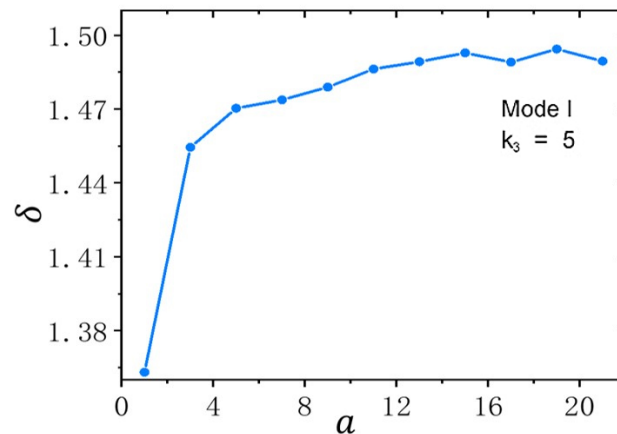

**Figure S2.** The numerical simulated results about gene's state dominance factor  $\delta$  which is consistent with that in Fig.4(c).  $\delta$  will increase with the increasing of the strength of external signal in Mode I. The values of other parameters are listed in Table I.

Moreover, the curve between  $\delta$  and  $a$  which is obtained by Monte Carlo simulation with the same set of parameters in Fig.4(c) is shown in Fig.S2. It is obviously that the trend of  $\delta$  is similar with the curve in Fig.4(c).

### 3 THE COMPARISONS BETWEEN THE TOTAL ENERGY DISSIPATION AND THE ENERGY DISSIPATION IN THE SYNTHESIS-DEGRADATION PROCESS OF ROCK IN MODE I AND II

The Fig.S3 shows the trends of the total energy dissipation (i.e.,  $EP$ ) and the energy dissipation in the synthesis-degradation process of ROCK (i.e.,  $EP_m$ ) with the increase of the strengthen of external stimulations (i.e.,  $a$ ) in Mode I and II. It is obviously that their trends are consistent as  $a$  increases in its respective modes. Specifically,  $EP$  and  $EP_m$  increase simultaneously in Mode I and decrease simultaneously in Mode II with the enhancing of the strengthen of external stimulations (i.e.,  $a$ ). Moreover, the difference between  $EP$  and  $EP_m$  diminishes both in Mode I and Mode II when  $a$  increases.

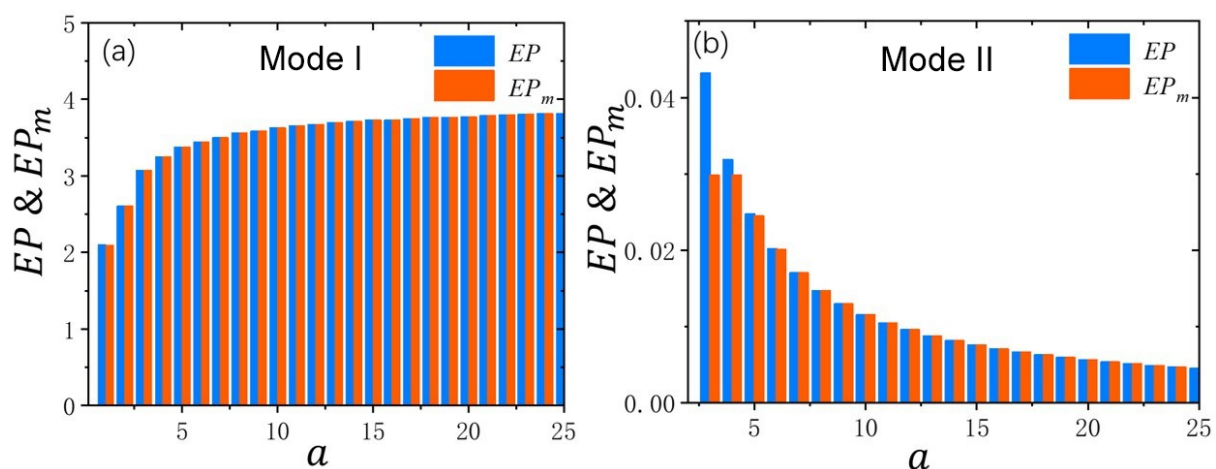

**Figure S3.** The comparisons between the total energy dissipation and the energy dissipation in the synthesis-degradation process of ROCK in Mode I and II. The values of all parameters are listed in Table I.

## 4 PARAMETERS TABLE

The values of the main parameters used in calculations are given in Table I. All these parameters have been normalized by the degradation rate of ROCK (i.e.,  $k_4$ ).

Table I: The values of parameters used in calculations

| Parameters                                                           | Value                       |
|----------------------------------------------------------------------|-----------------------------|
| The reaction rate of positive control ( $k_1$ )                      | 20                          |
| The reaction rate of negative control ( $k_2$ )                      | 10                          |
| The synthetic rate of ROCK ( $k_3$ )                                 | 1.5 (Mode I) or 5 (Mode II) |
| The basic switch rate of gene to “on” state ( $k_{\text{on}}$ )      | 2                           |
| The basic switching rate of gene to “off” state ( $k_{\text{off}}$ ) | 2                           |
